# Supplementary material for: Efficacy, safety, and biomarker analyses of bintrafusp alfa, a bifunctional fusion protein targeting TGF-β and PD-L1, in patients with advanced non-small cell lung cancer
Source: PubMed Central journal article supplement — J Immunother Cancer. 2024 Mar 13;12(3):e008480. doi: 10.1136/jitc-2023-008480 (PMC10941133; doi:10.1136/jitc-2023-008480), 2024-03-13
Supplement: jitc-2023-008480supp001.pdf [file jitc-2023-008480supp001.pdf]

1 **Efficacy, safety, and biomarker analyses of bintrafusp alfa, a bifunctional fusion**  
2 **protein targeting TGF- $\beta$  and PD-L1, in patients with advanced non-small cell lung**  
3 **cancer**

4 **Authors:** Arun Rajan, MD,<sup>1</sup> Houssein Abdul Sater, MD,<sup>2</sup> Osama Rahma, MD,<sup>3</sup> Richy  
5 Agajanian, MD,<sup>4</sup> Wiem Lassoued, PhD,<sup>5</sup> Jennifer Marté, MD,<sup>6</sup> Yo-Ting Tsai, PhD,<sup>5</sup> Renee N.  
6 Donahue, PhD,<sup>5</sup> Elizabeth Lamping RN,<sup>6</sup> Shania Bailey, BS,<sup>7</sup> Andrew Weisman, PhD,<sup>8</sup> Beatriz  
7 Walter Rodriguez, MD, PhD,<sup>9</sup> Rena Ito, MD, PhD,<sup>10</sup> Yulia Vugmeyster, PhD,<sup>11</sup> Masashi Sato,  
8 MSc,<sup>10</sup> Andreas Machl, PhD,<sup>11</sup> Jeffrey Schlom, PhD,<sup>5</sup> James L. Gulley MD, PhD,<sup>5</sup>

9

10 **SUPPLEMENTARY MATERIALS**

11

12 **Section A.** Details of the treatment procedures and statistical analyses.

13 **Section B.** Details of biomarker methodologies.

14 **List of Supplementary Tables and Figures**

15 **Supplementary Table 1:** Details of the antibodies, protocols, and Opal kits used.

16 **Supplementary Table 2.** Baseline and disease characteristics of biomarker-evaluable patients

17 **Supplementary Table 3.** Baseline patient PD-L1 expression based on various cut-off points in  
18 non-biomarker evaluable patients

19 **Supplementary Table 4:** Efficacy according to Response Evaluation Criteria in Solid Tumors  
20 1.1 as assessed by the investigator.

21

22 **Supplementary Table 5.** Patients reporting adverse events of special interest.

23 **Supplementary Table 6.** Changes in the peripheral immune profile of patients after one, three,  
24 and six cycles of therapy. Changes in (A) soluble analytes, (B) complete blood counts, and (C)  
25 PBMC immune subsets before and during treatment 15, 43, and 85 days after the initiation of  
26 bintrafusp alfa.

27 **Supplementary Figure 1.** Differences in the peripheral immune profile of patients who were  
28 ICI-naïve vs. ICI-experienced. Baseline levels of (A) soluble analytes (measured by enzyme-  
29 linked immunosorbent and Olink assay), (B) complete blood counts, and (C) PBMC immune cell  
30 subsets (measured by flow cytometry) that were different between patients who were ICI-naïve  
31 (n=6) and ICI-experienced (n=8) before treatment with bintrafusp alfa. (D) Changes in PBMC  
32 immune subsets after one cycle of therapy (D15) vs. baseline that were different between

33 patients who were ICI-naïve and those who were ICI-experienced before treatment with  
34 bintrafusp alfa.

35 **Supplementary Figure 2.** The peripheral immune profile of patients pre- and on-treatment with  
36 bintrafusp alfa associates with clinical response as measured by BOR. Baseline levels (A) and  
37 early changes after (B) 1 cycle (day 15 vs. pre), (C) 2 cycles (day 29 vs. pre), and (D) 3 cycles  
38 (day 43 vs. pre) of bintrafusp alfa in soluble analytes and complete blood counts that associate  
39 with BOR.

40 **Supplementary Figure 3.** Representative hematoxylin and eosin showing fibrosis on-treatment  
41 with bintrafusp alfa. (A) Pre-treatment biopsy shows a moderately differentiated  
42 adenocarcinoma. (B) On-treatment tumor biopsy from the same patient highlights areas of  
43 fibrosis and inflammation. H&E images were scanned at 20X resolution.

44 **Supplementary Figure 4.** Changes in immune cell profiles in the tumor microenvironment of  
45 patients pre- and on-treatment with bintrafusp alfa were grouped by PFS (<3 months vs. >3  
46 months). (A) Each pie chart shows percentages of various immune subsets in biopsies from each  
47 patient pre-treatment (designated as A for each patient number) and on-treatment (designated as  
48 B for each patient number) with bintrafusp alfa. (B) Representative 20X images of paired biopsy  
49 tissues from two patients (#507 and #510) immuno-stained with the multiplex IF-panel.  
50

## 51 **Section A. Details of the treatment procedures and statistical analysis**

### 52 **Treatment procedures**

53 Premedication with an antihistamine and acetaminophen (administered 30–60 min before  
54 each dose of bintrafusp alfa) was optional for all infusions to mitigate potential infusion-related  
55 reactions; steroids were not permitted as premedication. Dose reduction was not permitted, and  
56 interruption or discontinuation of bintrafusp alfa was allowed if treatment-related adverse events,  
57 infusion-related reactions of grade  $\geq 2$  severity, or severe or life-threatening adverse events (AEs)  
58 occurred.

59 Tumor response was assessed by radiographic imaging using RECIST version 1.1 6  
60 weeks after starting treatment, then every 6 weeks for the first year and every 12 weeks  
61 thereafter. Response was confirmed by repeated radiographic assessment 4 weeks or longer from  
62 the first documented response. To evaluate the safety of bintrafusp alfa, AEs were monitored

63 throughout treatment and assessed using CTCAE version 4.03 at 28 days after the last study  
64 dose, at 10 weeks post-treatment, and every 12 weeks thereafter.

### 65 **Statistical analysis**

66 The uncertainty of the estimates was assessed by calculating a 95% exact (Clopper–  
67 Pearson) confidence interval. The disease control rate was defined as the proportion of patients  
68 with a confirmed best overall response (BOR) of complete response (CR), partial response (PR),  
69 stable disease (SD), or non-CR/nonprogressive disease. The duration of response was analyzed  
70 using Kaplan–Meier analysis as were progression-free survival (PFS) and overall survival.  
71 Safety and pharmacokinetic parameters were analyzed using descriptive statistics. PK parameters  
72 after the first dose, including concentration after the end of infusion ( $C_{\text{eoi}}$ ), area under the serum  
73 concentration–time curve, clearance, and half-life, were derived via noncompartment analysis.  
74 Furthermore,  $C_{\text{eoi}}$  and  $C_{\text{trough}}$  were obtained throughout the treatment period (reported as  
75 geometric mean with geometric coefficient variation percentage).

76

### 77 **Section B. Details of biomarker methodologies**

78 Programmed death ligand 1 tumor cell expression was determined using different  
79 immunohistochemistry assays, such as antibody clone 73-10, E1L3N, 22C3 (DAKO FDA-  
80 approved pharmDx™ protocol using the DAKO automated link 48 platform) [1-3], VENTANA  
81 PD-L1 (SP263) [4], and clone SP142 from Abcam (catalog ab228463) using the Leica Bond  
82 Max platform. The peripheral immunome of patients (n = 14) with non-small cell lung cancer  
83 enrolled at the National Cancer Institute (NCI) was analyzed before treatment with bintrafusp  
84 alfa and at 2 (after 1 cycle), 4 (after 2 cycles), 6 (after 3 cycles), and 12 (after 6 cycles) weeks  
85 after therapy initiation, where samples were available. Patients were analyzed for levels and

86 changes in (a) multiple serum and plasma soluble factors, including analytes reflecting immune  
87 stimulatory and inhibitory status, (b) complete blood counts, and (c) 158 immune cell subsets.  
88 For the analyses of peripheral immune parameters with clinical response, patients with a PFS of  
89 >3 months (n = 8) were compared with those with a PFS of <3 months (n = 6). Analyses were  
90 also performed by comparing patients with a BOR of CR or PR (n = 3) with those with a BOR of  
91 SD (n = 9) or progressive disease (PD) (n = 2). Analyses were also performed by comparing the  
92 peripheral immune profile of immune checkpoint inhibitor (ICI)-naïve patients (n = 6) with that  
93 of ICI-experienced patients (n = 8) and of patients with a history of heavy smoking (n = 10) with  
94 that of nonsmokers (n = 4).

95 Complete blood counts with differential analysis were performed at the NCI's Center for  
96 Cancer Research, and the neutrophil-to-lymphocyte ratio was subsequently calculated. For serum  
97 assays, blood was collected in serum separator tubes, centrifuged, and stored at  $-80^{\circ}\text{C}$  before  
98 analysis. For plasma assays, blood was collected in ethylenediaminetetraacetic acid tubes,  
99 centrifuged, and stored at  $-80^{\circ}\text{C}$  before analysis. For the analysis of peripheral blood  
100 mononuclear cells (PBMCs), blood was collected in sodium heparin tubes, and PBMCs were  
101 isolated after Ficoll–Hypaque density gradient separation. Cells were cryopreserved in 90% heat-  
102 inactivated human AB serum and 10% dimethyl sulfoxide at a concentration of  $1 \times 10^7$  cells/mL  
103 before analysis.

104 The serum levels of IL-8, sCD27, sCD40L, and sPD-L1 and plasma levels of sPD-1,  
105 sCD73, TGF- $\beta$ 1, and Granzyme B were analyzed using commercially available kits according to  
106 the manufacturers' instructions. IL-8 was measured using AlphaLISA (PerkinElmer, Waltham,  
107 MA, USA); sCD27 and sCD40L were measured using instant enzyme-linked immunosorbent  
108 assay (ELISA) kits (Life Technologies, Carlsbad, CA, USA); sPD-1, sPD-L1, and sCD73 were

109 measured using ELISA kits from Abcam (Cambridge, UK); and TGF- $\beta$ 1 and Granzyme B were  
110 measured using ELISA kits from R&D Systems (Minneapolis, MN, USA). Plasma samples were  
111 also analyzed using Olink Target 96 Immuno-Oncology panel for biomarker discovery (Olink,  
112 Watertown, MA, USA).

113 Cryopreserved PBMCs collected before and after bintrafusp alfa therapy were examined  
114 via multicolor flow cytometry using 30 markers in four panels to identify 158 peripheral immune  
115 cell subsets[5] following methods previously described.[6,7] The subsets evaluated included 10  
116 parental cell types (CD4<sup>+</sup> and CD8<sup>+</sup> T cells, regulatory T cells, NK cells, NKT cells,  
117 conventional dendritic cells, plasmacytoid dendritic cells, B cells, myeloid-derived suppressor  
118 cells, and monocytes) and 148 refined subsets related to the maturation/function of the parental  
119 cell types. Flow cytometry files were acquired on an LSR Fortessa equipped with five lasers and  
120 analyzed using FlowJo v.9.9.6 for Macintosh, with nonviable cells excluded and negative gates  
121 based on fluorescence-minus-one controls. The frequency of all subsets was calculated as a  
122 percentage of PBMCs to eliminate any bias that might occur in the smaller populations with  
123 fluctuations in parental leukocyte populations.

124 Multiplex immunofluorescence staining and multispectral imaging: Formalin-fixed  
125 paraffin-embedded 5- $\mu$ m sections from tumor biopsies were immunostained using Opal  
126 multiplex 6-plex kits according to the manufacturer's protocol (Akoya Biosciences) for a panel  
127 of DAPI, CD4, CD8, FOXP3, CD56, CD68, and CD163. Deparaffinization, rehydration, epitope  
128 retrieval, and staining of slides were performed using Leica BOND RX Autostainer (Leica). The  
129 optimum staining conditions for each antibody were determined using IHC and single  
130 immunofluorescence before combination. Details regarding the antibodies, protocols, and opals  
131 used in this panel are described in Supplementary Table 1. Hematoxylin and eosin and multiplex

132 immunofluorescence whole-slide scans were captured using Vectra Polaris (PerkinElmer) at 20x  
133 magnification. Selected regions of interest (ROI) were scanned at 40x magnification for  
134 multispectral (MS) imaging. MS images were unmixed and analyzed using InForm, version 2.5  
135 (Akoya Biosciences). Using training ROI images, an algorithm was built and applied for cell  
136 segmentation and phenotyping. All immune cell infiltrates were measured as cell counts/mm<sup>2</sup> of  
137 tissue (density).

138 T-cell receptor (TCR) sequencing: TCR sequencing of biopsy tissue obtained before and during  
139 treatment (~7 weeks after treatment initiation) was performed using the Adaptive  
140 Biotechnologies immunoSEQ assay where adequate samples were available (n = 9). Eight  
141 samples were fresh-frozen cores; one was formalin-fixed, paraffin-embedded tissue. TCR-seq  
142 was also performed on the corresponding PBMCs. The number of clones comprising the top  
143 25% of the T-cell repertoire were analyzed, and their associations with the BOR were  
144 investigated.

145 **Supplementary references:**

- 146 1. Grote HJ, Feng Z, Schlichting M, et al. Programmed death-ligand 1  
147 immunohistochemistry assay comparison studies in NSCLC: characterization of the 73-  
148 10 assay. *J Thorac Oncol.* 2020;15:1306–1316.
- 149 2. Munari E, Zamboni G, Lunardi G, et al. PD-L1 expression in non-small cell lung cancer:  
150 evaluation of the diagnostic accuracy of a laboratory-developed test using clone E1L3N  
151 in comparison with 22C3 and SP263 assays. *Hum Pathol.* 2019;90:54–59.
- 152 3. Torous VF, Rangachari D, Gallant BP, Shea M, Costa DB, VanderLaan PA. PD-L1  
153 testing using the clone 22C3 pharmDx kit for selection of patients with non-small cell

- 154 lung cancer to receive immune checkpoint inhibitor therapy: are cytology cell blocks a  
155 viable option? *J Am Soc Cytopathol.* 2018;7:133–141.
- 156 4. Ventana PD-L1 (SP263) Assay. CE marked package insert. Roche Diagnostics; 2022.
- 157 5. Donahue RN, Marté JL, Goswami M, et al. Interrogation of the cellular immunome of  
158 cancer patients with regard to the COVID-19 pandemic. *J Immunother Cancer.*  
159 2021;9:e002087.
- 160 6. Lepone LM, Donahue RN, Grenga I, et al. Analyses of 123 peripheral human immune  
161 cell subsets: defining differences with age and between healthy donors and cancer  
162 patients not detected in analysis of standard immune cell types. *J Circ Biomark.* 2016;5:5.
- 163 7. Donahue RN, Lepone LM, Grenga I, et al. Analyses of the peripheral immunome  
164 following multiple administrations of avelumab, a human IgG1 anti-PD-L1 monoclonal  
165 antibody. *J Immunother Cancer.* 2017;5:20.

166 **Supplementary Table 1:** Details of the antibodies, protocols, and Opal kits used

| <b>Antibody</b> | <b>Clone</b> | <b>Catalog#</b> | <b>Company</b> | <b>Dilution</b> | <b>ER (Leica)</b> | <b>Secondary antibody (Vector labs)</b> | <b>OPAL (Akoya Biosciences)</b> |
|-----------------|--------------|-----------------|----------------|-----------------|-------------------|-----------------------------------------|---------------------------------|
| <b>CD68</b>     | D4B9C        | 76437           | Cell signaling | 1:400           | ER1               | Immpress Mouse/Rabbit                   | 520 (FP1487001KT)               |
| <b>CD4</b>      | EPR6855      | ab133616        | Abcam          | 1:250           | ER1               | Immpress Mouse/Rabbit                   | 570 (FP1488001KT)               |
| <b>CD8</b>      | EPR10640     | ab215041        | Abcam          | 1:100           | ER1               | Immpress Mouse/Rabbit                   | 540 (FP1494001KT)               |
| <b>FOXP3</b>    | SP97         | MA5-16365       | Thermo-Fisher  | 1:200           | ER2               | Immpress Mouse/Rabbit                   | 620 (FP1495001KT)               |
| <b>CD163</b>    | EPR19518     | ab182422        | Abcam          | 1:200           | ER2               | Immpress Mouse/Rabbit                   | 650 (FP1496001KT)               |
| <b>CD56</b>     | MRQ-42       | 156R-94         | Sigma-Aldrich  | 1:200           | ER2               | Immpress Mouse/Rabbit                   | 690 (FP1497001KT)               |

167 CD4/8/56/68/163; cluster of differentiation 4/8/56/68/163; FOXP3, forkhead box P3

168

169

170

171

172

173

174

175

176

177

178

179

180

181

182

183

184



185 **Supplementary Table 2.** Baseline and disease characteristics in biomarker-evaluable patients

| Characteristics, n (%)                                                             | Biomarker-evaluable cohort |                         |
|------------------------------------------------------------------------------------|----------------------------|-------------------------|
|                                                                                    | ICI-naïve (n = 6)          | ICI-experienced (n = 8) |
| <b>Sex</b>                                                                         |                            |                         |
| Male                                                                               | 2 (33.3)                   | 5 (62.5)                |
| Female                                                                             | 4 (66.7)                   | 3 (37.5)                |
| <b>Age</b>                                                                         |                            |                         |
| Median (range), years                                                              | 60.5 (50–73)               | 58.5 (52–73)            |
| <65 years                                                                          | 4 (66.7)                   | 5 (62.5)                |
| ≥65 years                                                                          | 2 (33.3)                   | 3 (37.5)                |
| <b>ECOG performance status</b>                                                     |                            |                         |
| 0                                                                                  | 1 (16.7)                   | 0                       |
| 1                                                                                  | 5 (83.3)                   | 8 (100.0)               |
| <b>Tumor cell PD-L1 expression<sup>a</sup></b>                                     |                            |                         |
| <1%                                                                                | 2 (33.0)                   | 1 (12.5)                |
| 1–49%                                                                              | 1 (16.7)                   | 1 (12.5)                |
| 50–75%                                                                             | 0                          | 1 (12.5)                |
| >75%                                                                               | 1 (16.7)                   | 1 (12.5)                |
| Not available                                                                      | 2 (34.0)                   | 4 (50.0)                |
| <b>EGFR mutation status<sup>b</sup></b>                                            |                            |                         |
| Wild type                                                                          | 4 (66.6)                   | 6 (85.7)                |
| Mutated                                                                            | 1 (16.7)                   | 1 (14.3)                |
| Not available                                                                      | 1 (16.7)                   | 0                       |
| <b>Tumor histology</b>                                                             |                            |                         |
| Adenocarcinoma                                                                     | 5 (83.3)                   | 6 (75.0)                |
| Squamous cell carcinoma                                                            | 0                          | 1 (12.5)                |
| Other                                                                              | 1 (16.7)                   | 1 (12.5)                |
| <b>Number of prior anticancer regimens</b>                                         |                            |                         |
| 0                                                                                  | 3 (50.0)                   | 0                       |
| 1                                                                                  | 1 (16.7)                   | 0                       |
| 2                                                                                  | 0                          | 5 (62.5)                |
| 3                                                                                  | 0                          | 2 (25.0)                |
| ≥4                                                                                 | 2 (33.3)                   | 1 (12.5)                |
| <b>Type of prior anticancer therapy for metastatic or locally advanced disease</b> |                            |                         |
| Anti-PD-(L)1                                                                       | 0                          | 7 (87.5)                |
| Cytotoxic therapy                                                                  | 2 (33.3)                   | 5 (62.5)                |
| Endocrine therapy                                                                  | 0                          | 0                       |
| Monoclonal antibody therapy                                                        | 0                          | 3 (37.5)                |
| Small molecules                                                                    | 2 (33.3)                   | 1 (12.5)                |
| Immunotherapy other than anti-PD-(L)1                                              | 1 (16.7)                   | 1 (12.5)                |
| Other                                                                              | 0                          | 0                       |

186 ECOG, Eastern Cooperative Oncology Group; ICI, immune checkpoint inhibitor; PD-L1, programmed cell death ligand 1.

187 Data are presented as n (%) or median (range)

188 <sup>a</sup> PD-L1 immunohistochemistry data were obtained using one of the following clones: 73-10, clone E1L3N, clone SP263, and

189 clone 22C3.

190 <sup>b</sup>The percentage is calculated based on the number of subjects with nonsquamous histology.

191

192

193 **Supplementary Table 3:** Baseline patient PD-L1 expression based on various cut-off points in  
 194 non-biomarker evaluable patients

195

| Tumour cell PD-L1 expression <sup>a,b</sup> | ICI-naïve (n = 12) | ICI-experienced (n = 15) |
|---------------------------------------------|--------------------|--------------------------|
| ≥10%                                        | 3 (25.0)           | 5 (33.3)                 |
| <10%                                        | 7 (58.3)           | 9 (60.0)                 |
| Not available                               | 2 (16.7)           | 1 (6.7)                  |
| ≥20%                                        | 3 (25.0)           | 5 (33.3)                 |
| <20%                                        | 7 (58.3)           | 9 (60.0)                 |
| Not available                               | 2 (16.7)           | 1 (6.7)                  |
| ≥50%                                        | 2 (16.7)           | 4 (26.7)                 |
| <50%                                        | 8 (66.7)           | 10 (66.7)                |
| Not available                               | 2 (16.7)           | 1 (6.7)                  |
| ≥80%                                        | 1 (8.3)            | 2 (13.3)                 |
| <80%                                        | 9 (75.0)           | 12 (80.0)                |
| Not available                               | 2 (16.7)           | 1 (6.7)                  |

196 ICI, immune checkpoint inhibitor; PD-L1, programmed cell death ligand 1; TPS, tumor proportion score.

197 <sup>a</sup>For 27 patients the calculated scorings for TPS ≥10%, ≥20%, ≥50% and ≥80% are based on a continuous reading of the TPS for  
 198 1+, 2+ and 3+ tumor cells. A TPS has been calculated by summing up the TPS scores for 1+, 2+ and 3+ tumor cells. Based on the  
 199 calculated TPS score the samples were classified as negative/positive for TPS ≥10%, ≥20%, ≥50% and ≥80% based on the  
 200 respective cut-point.

201 <sup>b</sup>PD-L1 immunohistochemistry data were obtained using the clone 73-10.

202

203

204

205

206

207

208

209

210

211

212

213

214

215

216

217 **Supplementary Table 4.** Efficacy according to RECIST 1.1 as assessed by the investigator

|                                                      | ICI-naïve (n = 18)       | ICI-experienced (n = 23)            |
|------------------------------------------------------|--------------------------|-------------------------------------|
| <b>Confirmed BOR</b>                                 |                          |                                     |
| Complete response (CR)                               | 1 (5.6)                  | 0                                   |
| Partial response (PR)                                | 4 (22.2)                 | 0                                   |
| Stable disease (SD)                                  | 5 (27.8)                 | 5 (21.7) <sup>a</sup>               |
| Progressive disease (PD)                             | 4 (22.2)                 | 13 (56.5) <sup>b</sup>              |
| Not evaluable                                        | 4 (22.2)                 | 5 (21.7)                            |
| Overall response rate (CR+PR),<br>(95% CI)           | 5 (27.8)<br>(9.7–53.5)   | 0<br>(0.0–14.8)                     |
| Disease control rate (95% CI)                        | 10 (55.6)<br>(30.8–78.5) | 5 (21.7) <sup>a</sup><br>(7.5–43.7) |
| Median progression-free survival, months<br>(95% CI) | 2.8<br>(1.4–6.5)         | 1.4<br>(1.3–1.4)                    |
| Median duration of response, months (95% CI)         | 16.8<br>(2.8–NE)         | NE<br>(NE–NE)                       |

218 BOR, best overall response; CI, confidence interval; ICI, immune checkpoint inhibitor; IRC, independent review committee; NE,  
219 not estimable; RECIST, Response Evaluation Criteria in Solid Tumors

220 Data are presented as n (%) and n (%; 95% CI), unless specified otherwise.

221 <sup>a</sup>Among the five patients with SD, three had stable disease at the initial tumor evaluation in week 6, which changed to  
222 progressive disease in the subsequent evaluation. The sum of the longest diameter at the initial tumor evaluation showed an  
223 increase of 19.9%, 19.5%, and 19.7% for these patients compared with the baseline measurements.

224 <sup>b</sup>Two cases of radiological pseudoprogression showed progressive disease at the first restaging, and on subsequent scans, they  
225 showed stable disease or partial response.

226

227 **Supplementary Table 5.** Patients reporting adverse events of special interest

|                                                           | ICI-naïve (n = 18)  |                    | ICI-experienced (n = 23) |                    |
|-----------------------------------------------------------|---------------------|--------------------|--------------------------|--------------------|
|                                                           | Any grade,<br>n (%) | Grade ≥3,<br>n (%) | Any grade,<br>n (%)      | Grade ≥3,<br>n (%) |
| <b>Immune-related AESI</b>                                | 3 (16.7)            | 0                  | 4 (17.4)                 | 1 (4.3)*           |
| Immune-related endocrinopathies:<br>adrenal insufficiency | 1 (5.6)             | 0                  | 1 (4.3)                  | 1 (4.3)*           |
| Adrenal insufficiency                                     | 1 (5.6)             | 0                  | 1 (4.3)                  | 1 (4.3)*           |
| Immune-related rash                                       | 2 (11.1)            | 0                  | 2 (8.7)                  | 0                  |
| Lichen planus                                             | 1 (5.6)             | 0                  | -                        | -                  |
| Pruritus                                                  | 2 (11.1)            | 0                  | 1 (4.3)                  | 0                  |
| Rash                                                      | -                   | -                  | 1 (4.3)                  | 0                  |
| Immune-related endocrinopathies:<br>thyroid disorders     | -                   | -                  | 1 (4.3)                  | 0                  |
| Hypothyroidism                                            | -                   | -                  | 1 (4.3)                  | 0                  |
| <b>Skin AESI</b>                                          | 4 (22.2)            | -                  | 5 (21.7)                 | -                  |
| Keratoacanthoma                                           | 3 (16.7)            | -                  | 3 (13.0)                 | -                  |
| Squamous cell carcinoma of skin                           | 1 (5.6)             | -                  | 0                        | -                  |
| Hyperkeratosis                                            | 0                   | -                  | 1 (4.3)                  | -                  |
| Actinic keratosis                                         | 0                   | -                  | 1 (4.3)                  | -                  |

228 \*Also reported as grade ≥4 events.

229 AESI, adverse events of special interest; ICI, immune checkpoint inhibitor

230

231 **Supplementary Table 6.** Changes in the peripheral immune profile of patients after one, three,  
232 and six cycles of therapy

**A**

| Soluble Analyte | Change | Timepoint 1 |            |                  |                             |                             | Timepoint 2 |            |              |                             |                             | Timepoint 3 |            |              |                             |                             |
|-----------------|--------|-------------|------------|------------------|-----------------------------|-----------------------------|-------------|------------|--------------|-----------------------------|-----------------------------|-------------|------------|--------------|-----------------------------|-----------------------------|
|                 |        | Median D1   | Median D15 | P value          | % with $\geq 25\%$ increase | % with $\geq 25\%$ decrease | Median D1   | Median D43 | P value      | % with $\geq 25\%$ increase | % with $\geq 25\%$ decrease | Median D1   | Median D85 | P value      | % with $\geq 25\%$ increase | % with $\geq 25\%$ decrease |
| sCD27           | ↑      | 62.3        | 77.6       | 0.068            | 50                          | 0                           | 62.3        | 86.8       | 0.077        | 50                          | 8                           | 62.4        | 95.4       | <b>0.020</b> | 78                          | 0                           |
| sCD27/sCD40L    | ↑      | 5.1         | 6.3        | <b>0.042</b>     | 57                          | 14                          | 4.5         | 5.8        | 0.151        | 50                          | 8                           | 4.4         | 8.3        | 0.055        | 78                          | 11                          |
| TGF $\beta$     | ↓      | 68247       | 1673       | <b>&lt;0.001</b> | 0                           | 100                         | 63510       | 1385       | <b>0.001</b> | 0                           | 100                         | 71714       | 1444       | <b>0.002</b> | 0                           | 100                         |
| CCL17           | ↑      | 11.27       | 11.88      | <b>0.049</b>     | 57                          | 7                           |             |            |              |                             |                             |             |            |              |                             |                             |

**B**

| Complete Blood Count | Change | Timepoint 1 |            |              |                             |                             | Timepoint 2 |            |         |                             |                             | Timepoint 3 |            |         |                             |                             |
|----------------------|--------|-------------|------------|--------------|-----------------------------|-----------------------------|-------------|------------|---------|-----------------------------|-----------------------------|-------------|------------|---------|-----------------------------|-----------------------------|
|                      |        | Median D1   | Median D15 | P value      | % with $\geq 25\%$ increase | % with $\geq 25\%$ decrease | Median D1   | Median D43 | P value | % with $\geq 25\%$ increase | % with $\geq 25\%$ decrease | Median D1   | Median D85 | P value | % with $\geq 25\%$ increase | % with $\geq 25\%$ decrease |
| White Blood          | ↑      | 7.2         | 8.4        | <b>0.006</b> | 57                          | 0                           | 7.2         | 7.6        | 0.080   | 31                          | 0                           | 7.2         | 6.7        | 0.123   | 55                          | 9                           |
| Neutrophil           | ↑      | 4.5         | 5.9        | <b>0.002</b> | 57                          | 0                           | 4.4         | 4.9        | 0.092   | 46                          | 8                           | 3.8         | 4.5        | 0.206   | 55                          | 9                           |

**C**

| PBMC Subset | Change | Timepoint 1 |            |                    |                             |                             | Timepoint 2 |            |              |                             |                             | Timepoint 3 |            |              |                             |                             |
|-------------|--------|-------------|------------|--------------------|-----------------------------|-----------------------------|-------------|------------|--------------|-----------------------------|-----------------------------|-------------|------------|--------------|-----------------------------|-----------------------------|
|             |        | Median D1   | Median D15 | P value            | % with $\geq 25\%$ increase | % with $\geq 25\%$ decrease | Median D1   | Median D43 | P value      | % with $\geq 25\%$ increase | % with $\geq 25\%$ decrease | Median D1   | Median D85 | P value      | % with $\geq 25\%$ increase | % with $\geq 25\%$ decrease |
| CD8         | ↓      | 11.5        | 9.4        | 0.049 <sup>A</sup> | 14                          | 36                          | 11.3        | 7.5        | <b>0.021</b> | 8                           | 67                          | 13.1        | 6.3        | <b>0.049</b> | 10                          | 70                          |
| NK-T        | ↓      | 1.7         | 0.9        | <b>0.025</b>       | 7                           | 64                          | 1.7         | 1.1        | <b>0.021</b> | 8                           | 67                          | 1.7         | 1.0        | 0.193        | 20                          | 50                          |
| B cells     | ↑      | 9.8         | 11.3       | 0.268              | 36                          | 7                           | 11.4        | 15.4       | <b>0.021</b> | 58                          | 0                           | 11.4        | 13.7       | 0.131        | 50                          | 10                          |
| cDC         | ↑      | 0.3         | 0.4        | 0.217              | 64                          | 14                          | 0.3         | 0.5        | <b>0.001</b> | 75                          | 0                           | 0.3         | 0.4        | <b>0.020</b> | 70                          | 10                          |
| pDC         | ↑      | 0.10        | 0.13       | <b>0.030</b>       | 57                          | 14                          | 0.10        | 0.12       | <b>0.021</b> | 75                          | 0                           | 0.1         | 0.1        | 0.275        | 60                          | 30                          |
| MDSC        | ↑      | 7.8         | 8.9        | <b>0.030</b>       | 64                          | 7                           | 6.7         | 5.6        | 0.733        | 42                          | 33                          | 7.8         | 12.0       | 0.084        | 50                          | 10                          |
| Monocytes   | ↑      | 22.0        | 26.8       | 0.035 <sup>A</sup> | 43                          | 0                           | 18.7        | 23.2       | 0.052        | 33                          | 0                           | 22.0        | 28.8       | <b>0.049</b> | 50                          | 0                           |
| EM CDB      | ↓      | 4.07        | 3.05       | <b>0.030</b>       | 14                          | 50                          | 3.46        | 2.18       | <b>0.005</b> | 8                           | 92                          | 4.07        | 1.69       | 0.065        | 10                          | 80                          |
| Ki67 + CDB  | ↓      | 0.26        | 0.17       | <b>0.020</b>       | 21                          | 57                          | 0.26        | 0.10       | <b>0.021</b> | 17                          | 67                          | 0.30        | 0.18       | 0.301        | 33                          | 67                          |

233

234 Changes in (A) soluble analytes, (B) complete blood counts, and (C) PBMC immune subsets  
235 before and during treatment 15, 43, and 85 days after the initiation of bintrafusp alfa. Changes in  
236 immune parameters between two timepoints were calculated using Wilcoxon signed-rank test.  
237 Units shown in A are U/mL for sCD27, pg/mL for TGF $\beta$ , and NPX for CCL17. Units shown are  
238 K/ $\mu$ L in B and % of PBMC in C. <sup>A</sup>Despite significant *p*-values, most patients did not exhibit a  
239 >25% change. CD, cluster of differentiation; CCL17, CC motif chemokine ligand 17; cDC,  
240 conventional dendritic cells; D, days; EM, effector memory; MDSC, myeloid-derived suppressor  
241 cells; NKT, natural killer T cells; NPX, normalized protein expression; PBMC, peripheral blood  
242 mononuclear cells; pDC, plasmacytoid dendritic cells; TGF- $\beta$ , transforming growth factor-beta;  
243 sCD27/sCD40L, soluble CD27/soluble CD40 ligand.

244

245

246 **Supplementary Figure 1.** Differences in the peripheral immune profile of patients who were  
247 ICI-naïve vs. ICI-experienced. Baseline levels of (A) soluble analytes (measured via enzyme-  
248 linked immunosorbent and Olink assays), (B) complete blood counts, and (C) PBMC immune  
249 subsets (measured via flow cytometry) that were different between patients who were ICI-naïve  
250 (n = 6) and those who were ICI-experienced (n = 8) before treatment with bintrafusp alfa. (D)  
251 Changes in PBMC immune subsets after one cycle of therapy (D15) vs. baseline that were  
252 different between patients who were ICI-naïve and those who were ICI-experienced before  
253 treatment with bintrafusp alfa. Graphs display the median frequency of analytes, and *p*-values  
254 were calculated using Mann–Whitney test. B cell, bursa-derived cells; CD, cluster of  
255 differentiation; D, day; EM, effector memory; EMRA, terminally differentiated effector  
256 memory; ICI, immune checkpoint inhibitor; IL-10, interleukin-10; NPX, normalized protein  
257 expression; NLR, neutrophil-to-lymphocyte ratio; PBMC, peripheral blood mononuclear cell;  
258 sPD-1/sPD-L1, soluble programmed death-1/ligand-1; Treg, regulatory T cells.

259

260

261

262

263

264

265

266

267

268

269

270

271

272

273

274

275

276

277

**A** Baseline: Soluble Analytes

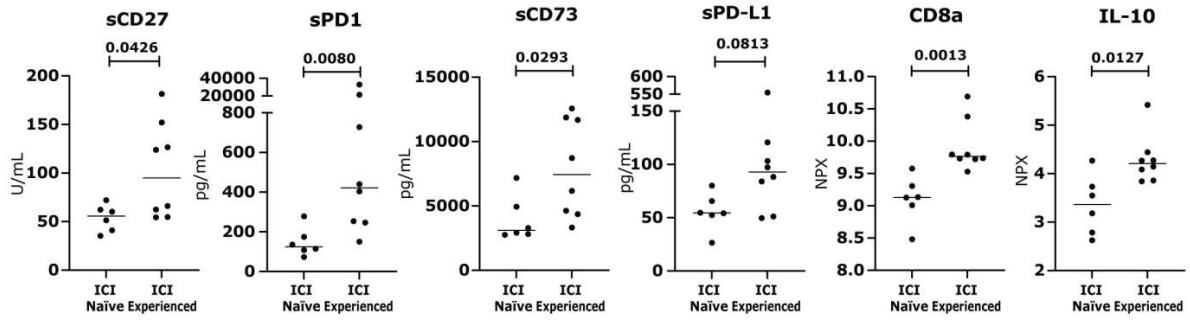

**B** Baseline: Complete Blood Counts

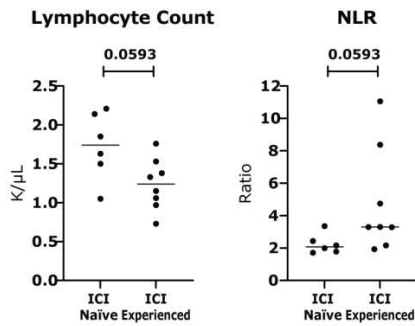

**C** Baseline: PBMC Subsets

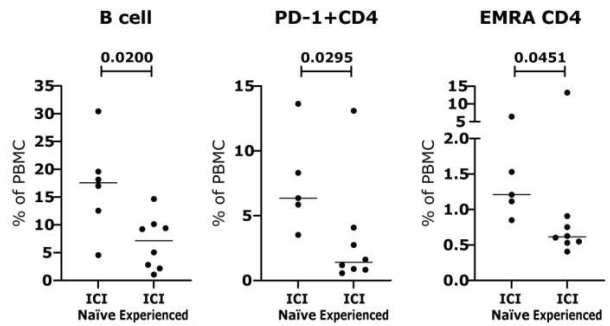

**D** Change (D15 vs Pre): PBMC Subsets

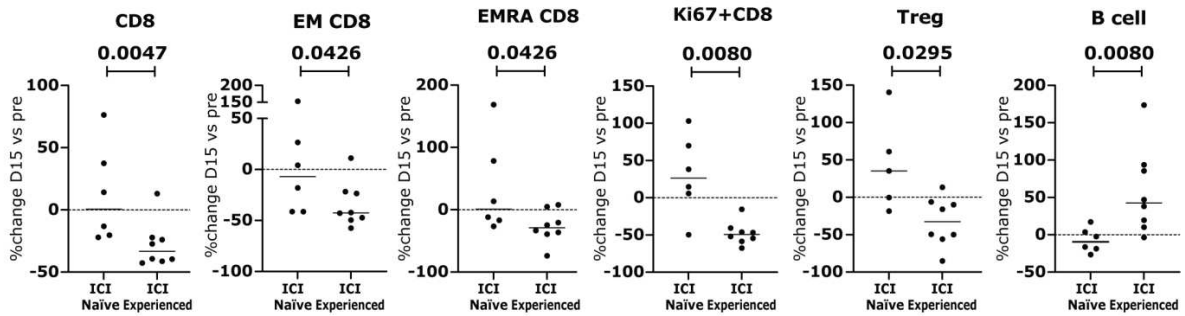

279 **Supplementary Figure 2.** The peripheral immune profile of patients pre- and on-treatment with  
280 bintrafusp alfa associates with clinical response as measured by BOR. Baseline levels (A) and  
281 early changes after (B) 1 cycle (day 15 vs. pre), (C) 2 cycles (day 29 vs. pre), and (D) 3 cycles  
282 (day 43 vs. pre) of bintrafusp alfa in soluble analytes and complete blood counts that associate  
283 with BOR. Patients with BOR of CR or PR (n = 3) were compared to those with a BOR of PD (n  
284 = 2) and SD (n = 9). Graphs display median frequency of analytes and *p* values were calculated  
285 using the Mann-Whitney test. BOR, best overall response; CCL17, C-C motif ligand 17; CD,  
286 cluster of differentiation; CR, complete response; CXCL5/10, C-X-C motif chemokine ligand  
287 5/10; D, day; IFN- $\gamma$ , interferon-gamma; IL-7/8, interleukin 7/8; NPX, normalized protein  
288 expression; PD, progressive disease; PR, partial response; SD, stable disease; s, soluble; sPD-  
289 1/sPD-L1, soluble programmed death-1/ligand-1; TNFSF14, tumor necrosis factor superfamily  
290 member 14.

291

292

293



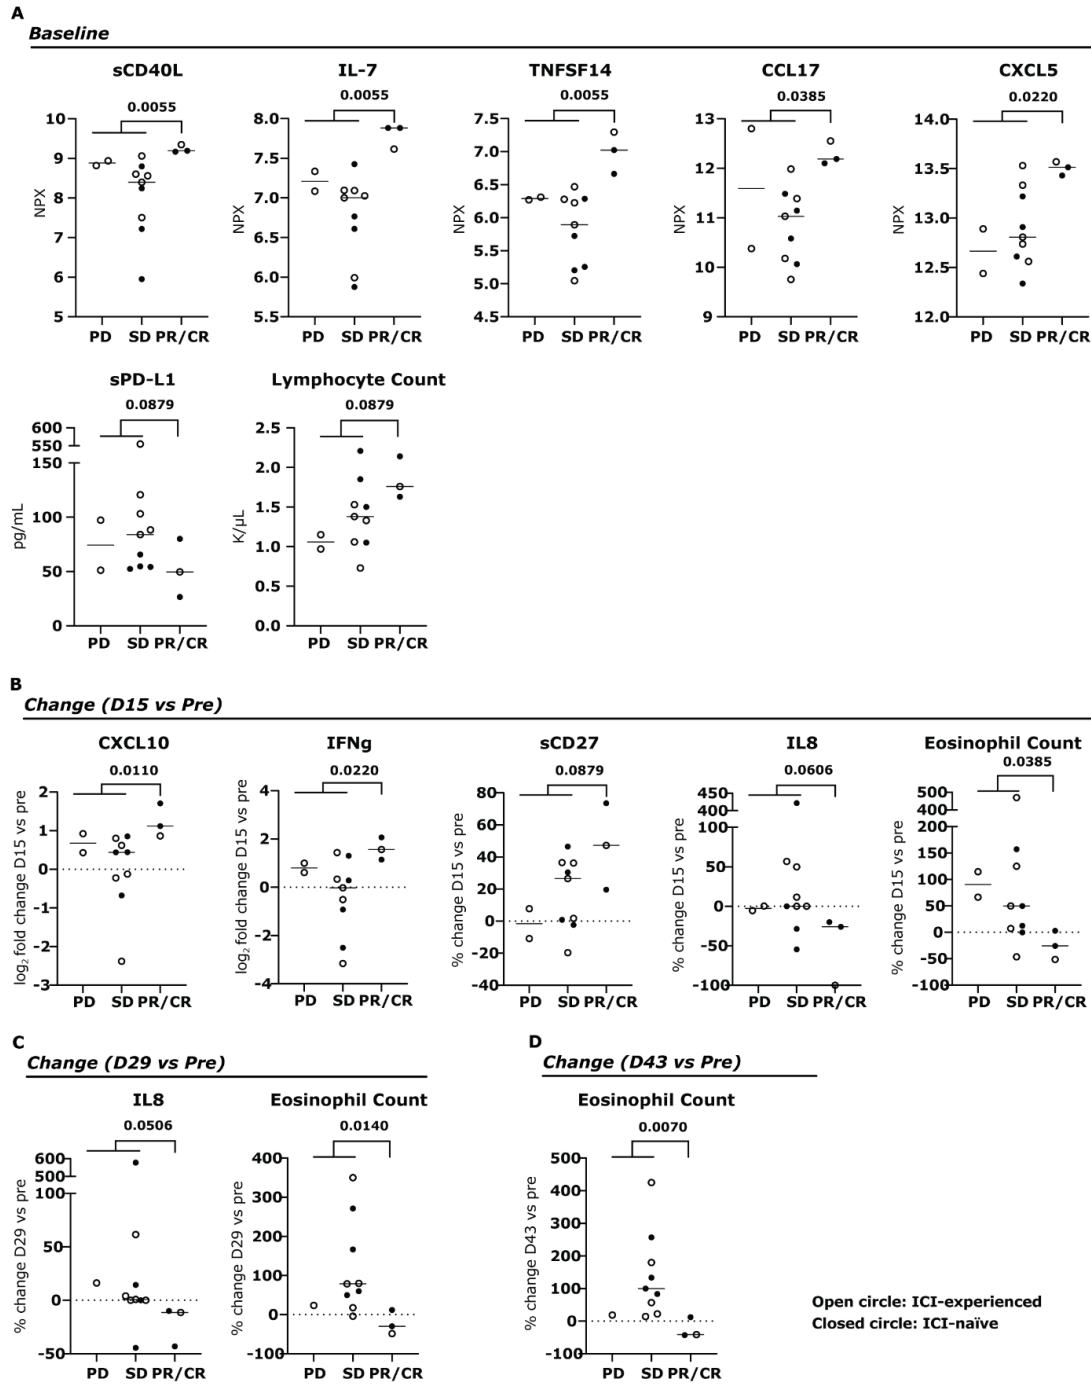

294

295

296 **Supplementary Figure 3.** Representative hematoxylin and eosin showing fibrosis on-treatment  
297 with bintrafusp alfa. (A) Pre-treatment biopsy shows a moderately differentiated  
298 adenocarcinoma. (B) On-treatment tumor biopsy from the same patient highlights areas of  
299 fibrosis and inflammation. H&E images were scanned at 20X resolution. H & E, hematoxylin  
300 and eosin.

301

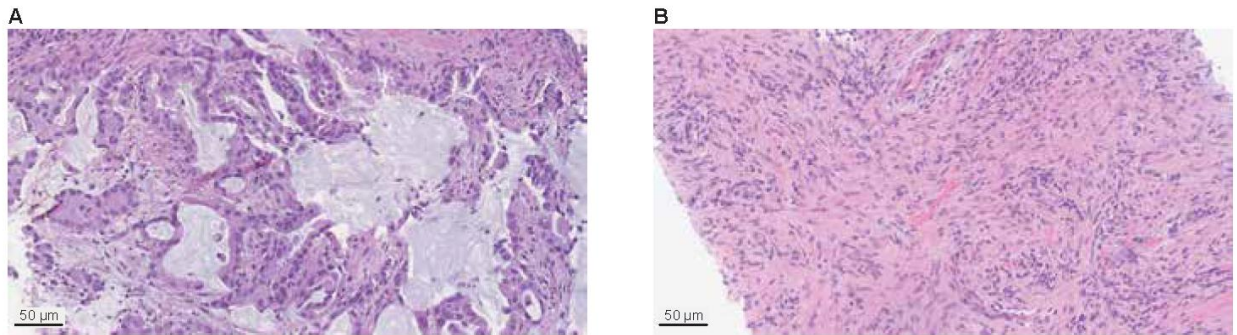

303 **Supplementary Figure 4.** Changes in immune cell profiles in the tumor microenvironment of  
 304 patients pre- and on-treatment with bintrafusp alfa were grouped by PFS (<3 months vs. >3  
 305 months). (A) Each pie chart shows percentages of various immune subsets in biopsies from each  
 306 patient pre-treatment (designated as A for each patient number) and on-treatment (designated as  
 307 B for each patient number). (B) Representative 20X images of paired biopsy tissues from two  
 308 patients (#507 and #510) immuno-stained with the multiplex IF-panel (CD4, CD8, CD68, CD56,  
 309 CD163, FOXP3 and DAPI) are shown. CD, cluster of differentiation 4/8/56/68/163; DAPI, 4',6-  
 310 diamidino-2-phenylindole; FOXP3, forkhead box P3; M1, inflammatory macrophages; M2,  
 311 tumor-tropic macrophages; PFS, progression-free survival; IF-panel, immunofluorescence-  
 312 panel.

313  
 314  
 315

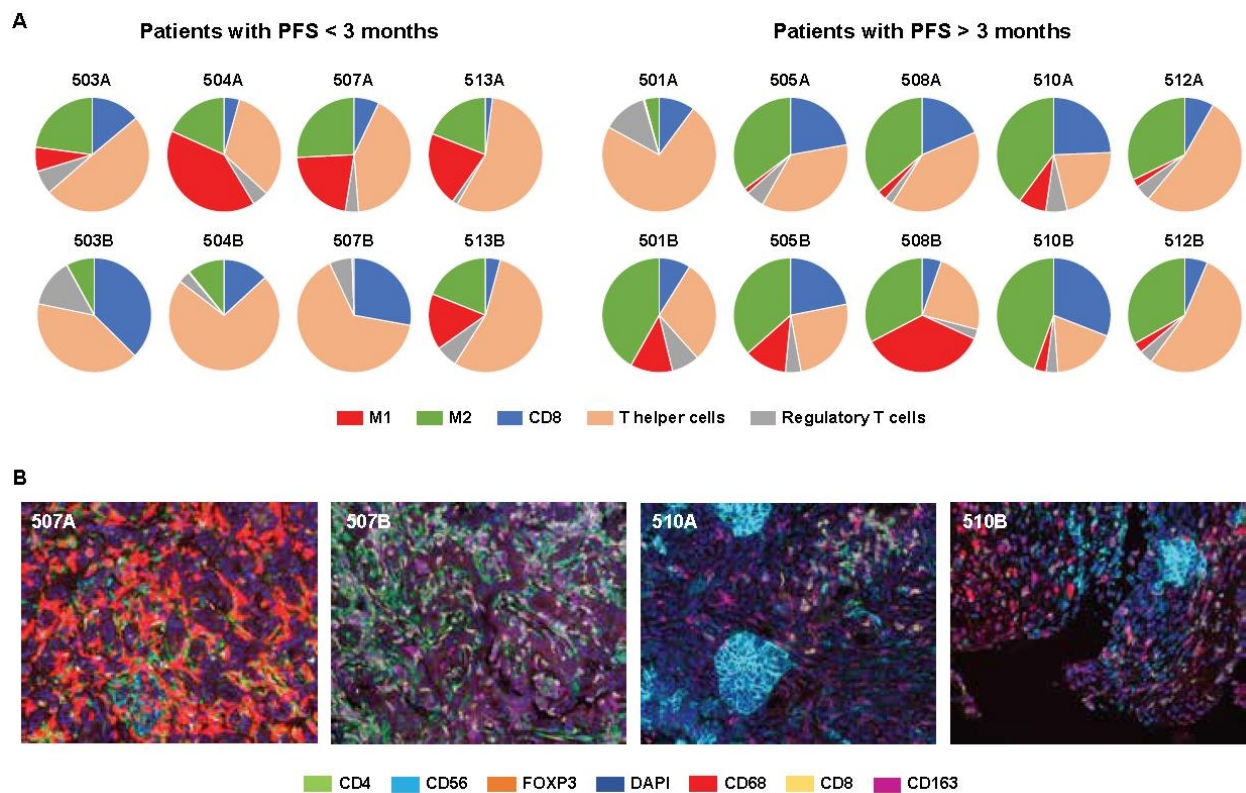

316
